# Supplementary material
Source: PubMed Central journal article supplement (PMC4794022)
Supplement: reej025269.wt1_default.pdf [file reej025269.wt1_default.pdf]

Odds ratios (OR) for the associations between selected Selective Serotonin Reuptake Inhibitors (SSRIs) and selected birth defects using different statistical methods, National Birth Defects Prevention Study, 1997-2009

| SSRI         |                                                     | Expose<br>d cases | cOR (95%<br>CI) | Frequentist<br>approach<br>LR<br>aOR (95% CI) | Bayesian<br>approach<br>pOR (95% CrI)<br>non-informative<br>prior | Bayesian<br>approach pOR<br>(95% CrI)<br>informative prior | Bayesian approach<br>pOR (95% CrI)<br>informative prior and<br>modeling the missing<br>values |
|--------------|-----------------------------------------------------|-------------------|-----------------|-----------------------------------------------|-------------------------------------------------------------------|------------------------------------------------------------|-----------------------------------------------------------------------------------------------|
| Citalopram   | Controls                                            | 29                |                 |                                               |                                                                   |                                                            |                                                                                               |
| Citalopram   | Neural tube defects                                 | 5                 | 0.9 (0.4-2.4)   | 1.0 (0.4-2.7)                                 | 1.0 (0.3-2.5)                                                     | 1.8 (1.0-3.0)                                              | 1.8 (1.0-3.0)                                                                                 |
| Citalopram   | Ventricular septal defects                          | 6                 | 1.2 (0.5-2.9)   | 1.2 (0.5-2.8)                                 | 1.1 (0.4-2.5)                                                     | 1.3 (0.9-1.8)                                              | 1.3 (0.9-1.8)                                                                                 |
| Citalopram   | Cleft lip w/wo cleft palate                         | 8                 | 1.1 (0.5-2.5)   | 1.1 (0.5-2.5)                                 | 1.1 (0.5-2.3)                                                     | 1.4 (0.7-2.7)                                              | 1.4 (0.7-2.7)                                                                                 |
| Citalopram   | Hypospadias                                         | 8                 | 1.2 (0.5-2.9)   | 1.1 (0.5-2.6)                                 | 1.1 (0.4-2.4)                                                     | 1.2 (0.7-2.0)                                              | 1.2 (0.7-2.1)                                                                                 |
| Escitalopram | Controls                                            | 26                |                 |                                               |                                                                   |                                                            |                                                                                               |
| Escitalopram | Septal defects                                      | 11                | 1.0 (0.5-2.1)   | 1.0 (0.5-2.1)                                 | 1.0 (0.5-2.0)                                                     | 1.3 (0.7-2.1)                                              | 1.3. (0.7-2.1)                                                                                |
| Fluoxetine   | Controls                                            | 74                |                 |                                               |                                                                   |                                                            |                                                                                               |
| Fluoxetine   | Ventricular septal defects                          | 16                | 1.3 (0.7-2.2)   | 1.2 (0.7-2.1)                                 | 1.2 (0.7-2.1)                                                     | 1.4 (1.0-1.9)                                              | 1.4 (1.0-1.9)                                                                                 |
| Fluoxetine   | Right ventricular outflow tract obstruction defects | 27                | 2.1 (1.4-3.4)   | 2.2 (1.4-3.4)                                 | 2.2 (1.4-3.4)                                                     | 2.0 (1.4-3.1)                                              | 2.0 (1.3-3.0)                                                                                 |
| Fluoxetine   | Esophageal atresia                                  | 10                | 2.2 (1.1-4.2)   | 2.0 (1.0-3.9)                                 | 1.8 (0.8-3.4)                                                     | No informative prior*                                      | 1.9 (0.9-3.6)                                                                                 |
| Fluoxetine   | Craniosynostosis                                    | 21                | 2.2 (1.4-3.7)   | 1.9 (1.1-3.1)                                 | 1.9 (1.1-3.0)                                                     | No informative prior*                                      | 1.9 (1.1-3.0)                                                                                 |
| Paroxetine   | Controls                                            | 42                |                 |                                               |                                                                   |                                                            |                                                                                               |

| <b>SSRI</b> |                                                           | <b>Expose<br/>d cases</b> | <b>cOR (95%<br/>CI)</b> | <b>Frequentist<br/>approach<br/>LR<br/>aOR (95% CI)</b> | <b>Bayesian<br/>approach<br/>pOR (95% CrI)<br/>non-informative<br/>prior</b> | <b>Bayesian<br/>approach pOR<br/>(95% CrI)<br/>informative prior</b> | <b>Bayesian approach<br/>pOR (95% CrI)<br/>informative prior and<br/>modeling the missing<br/>values</b> |
|-------------|-----------------------------------------------------------|---------------------------|-------------------------|---------------------------------------------------------|------------------------------------------------------------------------------|----------------------------------------------------------------------|----------------------------------------------------------------------------------------------------------|
| Paroxetine  | Anencephaly                                               | 6                         | 2.7 (1.2-6.4)           | 3.1 (1.3-7.3)                                           | 3.1 (1.2-7.0)                                                                | 3.3 (1.6-6.2)                                                        | 3.3 (1.6-6.3)                                                                                            |
| Paroxetine  | Atrial septal defects                                     | 15                        | 1.9 (1.1-3.4)           | 2.0 (1.1-3.6)                                           | 1.8 (1.0-3.3)                                                                | 1.8 (1.1-3.0)                                                        | 1.8 (1.1-3.0)                                                                                            |
| Paroxetine  | Right ventricular<br>outflow tract<br>obstruction defects | 16                        | 2.3 (1.3-4.0)           | 2.1 (1.1-3.7)                                           | 2.0 (1.1-3.5)                                                                | 2.4 (1.4-3.9)                                                        | 2.5 (1.5-4.0)                                                                                            |
| Paroxetine  | Cleft palate                                              | 10                        | 1.7 (0.9-3.4)           | 1.6 (0.8-3.2)                                           | 1.0 (0.4-2.2)                                                                | 1.3 (0.7-2.3)                                                        | 1.6 (0.9-2.7)                                                                                            |
| Paroxetine  | Hypospadias                                               | 9                         | 0.9 (0.4-2.0)           | 0.8 (0.4-1.7)                                           | 0.8 (0.4-1.8)                                                                | 1.1 (0.6-1.9)                                                        | 1.1 (0.6-1.9)                                                                                            |
| Paroxetine  | Gastroschisis                                             | 13                        | 2.7 (1.4-5.0)           | 3.1 (1.6-5.8)                                           | 2.5 (1.2-4.8)                                                                | No informative<br>prior*                                             | 2.5 (1.2-4.8)                                                                                            |
| Paroxetine  | Omphalocele                                               | 6                         | 3.8 (1.6-9.1)           | 3.7 (1.6-8.8)                                           | 3.5 (1.3-8.0)                                                                | No informative<br>prior*                                             | 3.6 (1.3-8.1)                                                                                            |
| Sertraline  | Controls                                                  | 115                       |                         |                                                         |                                                                              |                                                                      |                                                                                                          |
| Sertraline  | Anencephaly                                               | 7                         | 1.2 (0.5-2.5)           | 1.3 (0.5-2.8)                                           | 1.3 (0.5-2.7)                                                                | 1.2 (0.5-2.5)                                                        | 1.2 (0.5-2.5)                                                                                            |
| Sertraline  | Septal defects                                            | 47                        | 1.0 (0.7-1.4)           | 1.0 (0.7-1.4)                                           | 1.0 (0.7-1.4)                                                                | 1.1 (0.8-1.4)                                                        | 1.1 (0.8-1.4)                                                                                            |
| Sertraline  | Anal atresia                                              | 11                        | 1.1 (0.6-2.0)           | 1.1 (0.6-2.0)                                           | 1.1 (0.6-2.0)                                                                | 1.4 (0.8-2.4)                                                        | 1.4 (0.8-2.3)                                                                                            |
| Sertraline  | Any limb reduction                                        | 13                        | 1.1 (0.6-1.9)           | 0.9 (0.5-1.6)                                           | 0.9 (0.5-1.6)                                                                | 1.2 (0.7-2.0)                                                        | 1.3 (0.8-2.1)                                                                                            |
| Sertraline  | Omphalocele                                               | 4                         | 0.9 (0.3-2.5)           | 0.6 (0.1-1.7)                                           | 0.6 (0.1-1.7)                                                                | 1.5 (0.7-2.8)                                                        | 1.6 (0.8-3.1)                                                                                            |

Abbreviations: cOR=crude odds ratio, LR=Logistic regression, aOR= adjusted odds ratio, CI=confidence interval, pOR= posterior odds ratio, CrI=credible interval
